# Supplementary material for: Palladium nanoparticles confined in uncoordinated amine groups of metal–organic frameworks as efficient hydrogen evolution electrocatalysts
Source: Royal Society of Chemistry journal article supplement (doi:10.1039/d3dt01150j), 2023-01-01
Supplement: d3dt01150j1.pdf [file d3dt01150j1.pdf]

# Palladium nanoparticles confined in uncoordinated amine groups of metal-organic frameworks as efficient hydrogen evolution electrocatalysts

Huimin Liu<sup>a</sup>, Chen Wang<sup>a</sup>, Chang Liu<sup>a</sup>, Xing Zong<sup>b</sup>, Yongfei Wang<sup>a,b\*</sup>, Zhizhi Hu<sup>a</sup>, Zhiqiang Zhang<sup>a\*</sup>

<sup>a</sup>School of Chemical Engineering, University of Science and Technology Liaoning 185 Qianshan Zhong Road, Anshan 114051, P. R. China

<sup>b</sup>School of Materials and Metallurgy, University of Science and Technology Liaoning Anshan, Liaoning 114051, P. R. China

E-mail: wyf8307@ustl.edu.cn, zzq@ustl.edu.cn

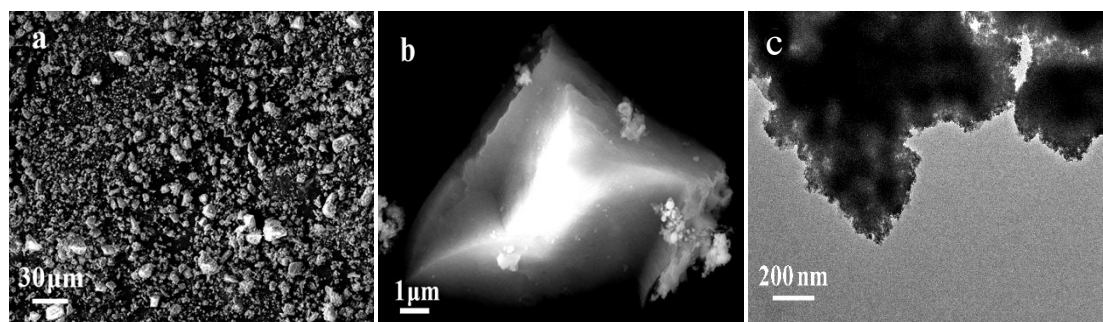

**Figure S1.** (a,b) SEM images of Uio-66-NH<sub>2</sub> and Pd@Uio-66, respectively. (c) HRTEM images of Pd@Uio-66-NH<sub>2</sub>.

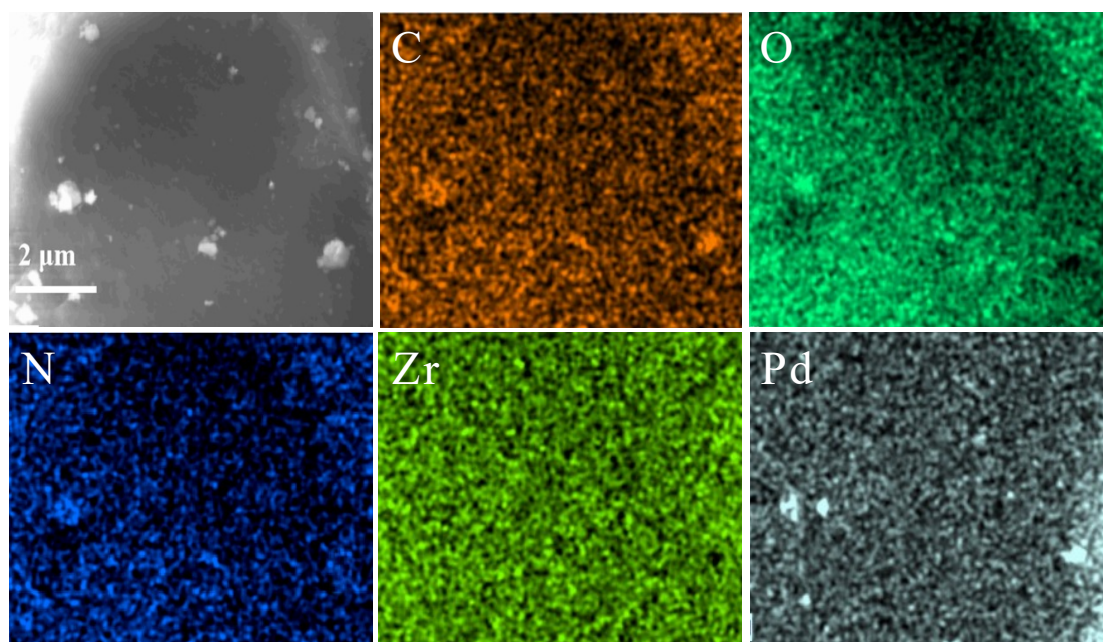

**Figure S2.** Elemental mappings of C, N, O, Zr, and Pd for Pd@UiO-66-NH<sub>2</sub>.

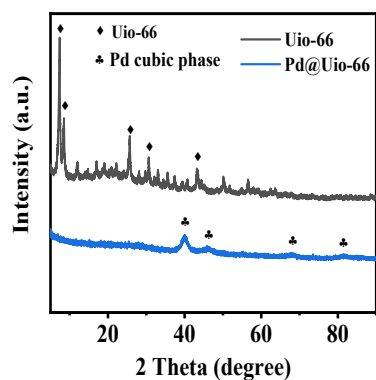

**Figure S3.** XRD image of UiO-66 and Pd@UiO-66.

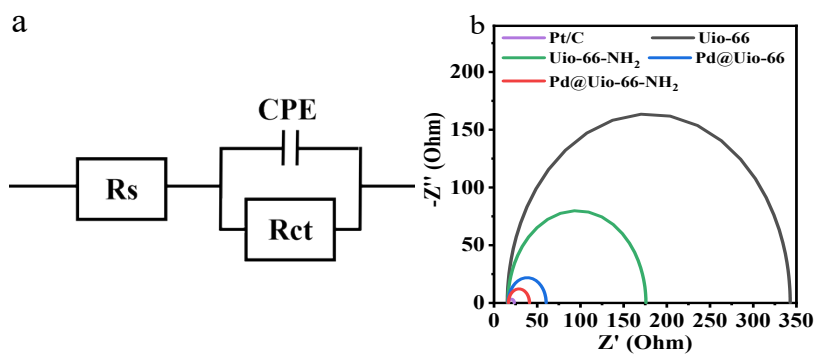

**Figure S4.** (a) The equivalent circuit used to simulate the Nyquist plots, where  $R_s$  represents the solution resistance, the  $R_{ct}$  related to the charge transfer resistance at the interface between catalysts and the electrolyte and CPE reflects constant phase element.

(b) Nyquist plots of the various electrocatalysts.

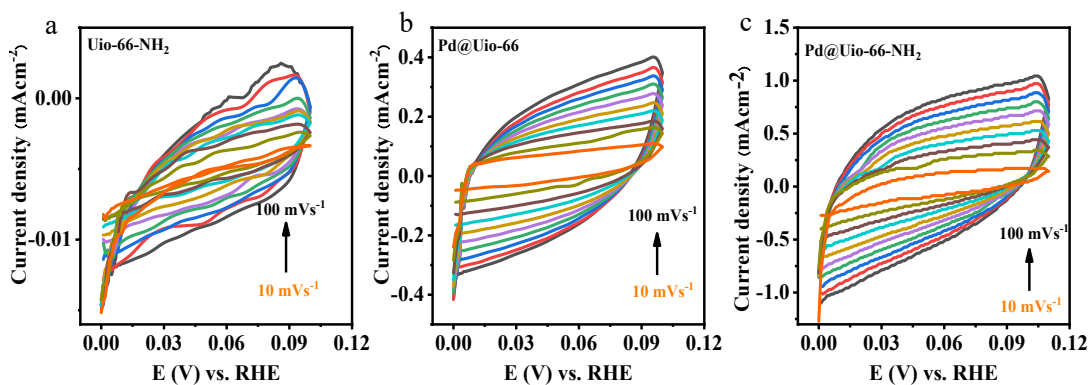

**Figure S5.** CV curves of (a) UiO-66-NH<sub>2</sub>, (b) Pd@UiO-66 and (c) Pd@UiO-66-NH<sub>2</sub> at different scan rates.

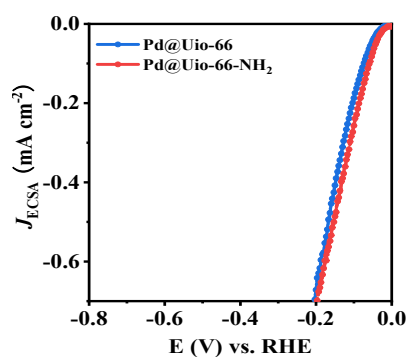

**Figure S6.** ECSA normalized LSV curves of Pd@Uio-66 and (c) Pd@Uio-66-NH<sub>2</sub>.

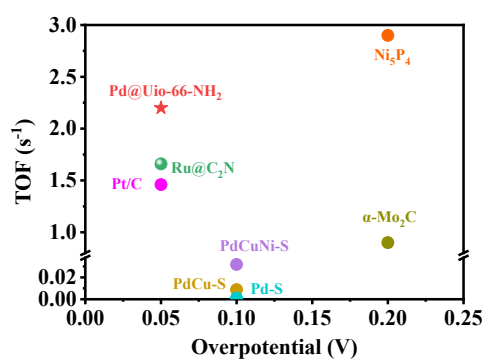

**Figure S7.** TOF values of Pd@Uio-66-NH<sub>2</sub> compared with the reported catalysts.

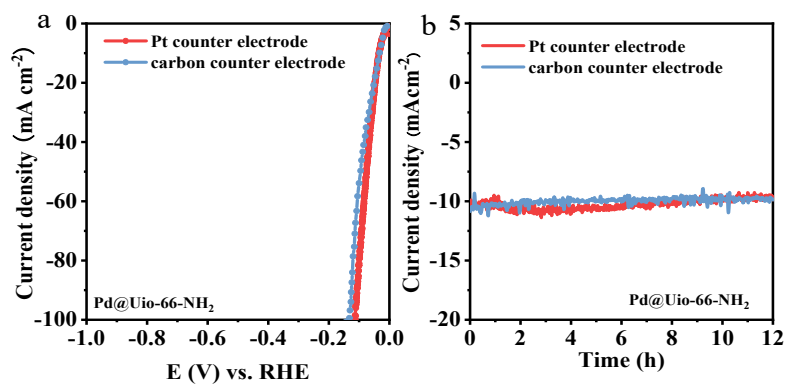

**Figure S8.** LSV curves (a) and the stability test (b) for Pd@Uio-66-NH<sub>2</sub> by using graphite electrode as the counter electrode.

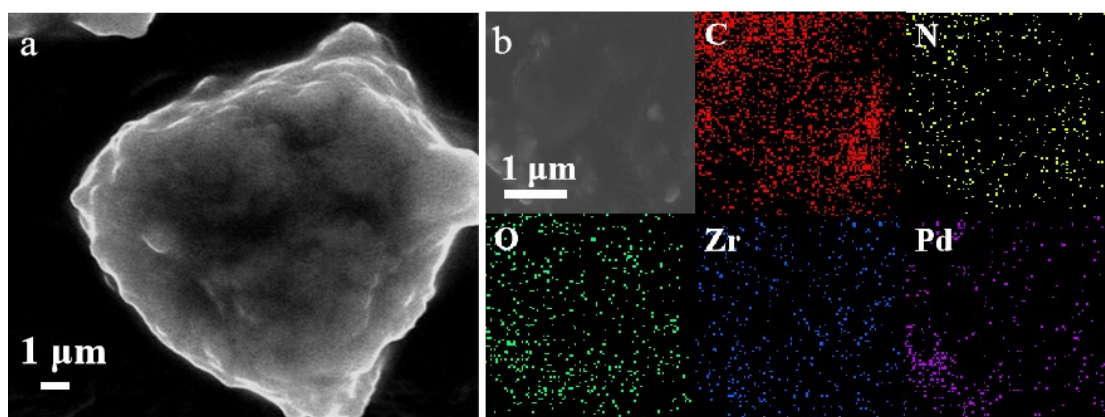

**Figure S9.** (a) SEM image and (b) corresponding elemental mappings of Pd@Uio-66-NH<sub>2</sub> after stability test.

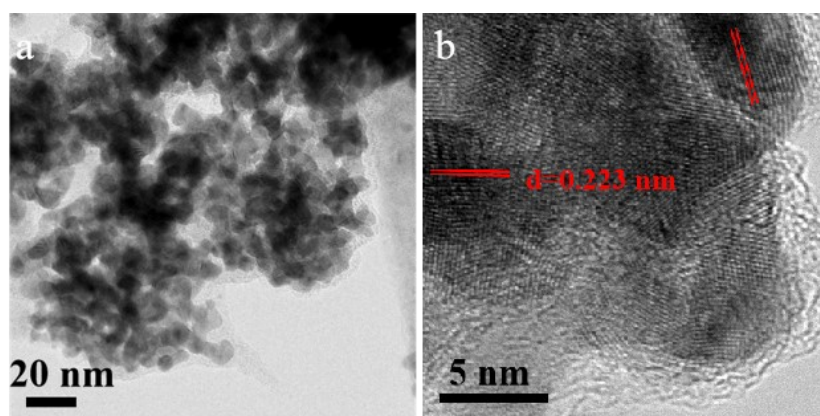

**Figure S10.** (a,b) HRTEM images of Pd@Uio-66-NH<sub>2</sub> after stability test.

**Table S1.** Comparison the HER activity of Pd@Uio-66-NH<sub>2</sub> with mentioned in this paper catalysts in 0.5 M H<sub>2</sub>SO<sub>4</sub> solutions.

| Catalyst                        | $E_{\text{onset}}$ (mV) | $E_{10}$ (mV) | $E_{20}$ (mV) |
|---------------------------------|-------------------------|---------------|---------------|
| Pt/C                            | 19                      | 28            | 35            |
| Uio-66                          | 152                     | 403           | 476           |
| Uio-66-NH <sub>2</sub>          | 59                      | 230           | 318           |
| Pd@Uio-66                       | 25                      | 70            | 99            |
| <b>Pd@Uio-66-NH<sub>2</sub></b> | 22                      | 34            | 47            |

**Table S2.** Comparison the HER activity of Pd@Uio-66-NH<sub>2</sub> with other Pd-based catalysts in 0.5 M H<sub>2</sub>SO<sub>4</sub> solutions.

| Catalyst                              | Overpotential<br>@10 mA cm <sup>-2</sup> (mV) | Tafel slope<br>(mV dec <sup>-1</sup> ) | Reference                               |
|---------------------------------------|-----------------------------------------------|----------------------------------------|-----------------------------------------|
| Pd@Uio-66-NH <sub>2</sub>             | 34                                            | 41                                     | This work                               |
| Pd/MOF                                | ~400                                          | 85                                     | Mater. Chem. Phys. 2020, 254, 123481    |
| Pd/HASG                               | 63                                            | 42                                     | Catal. Today. 2020, 357, 279            |
| Pd1/NMC                               | 37                                            | 37                                     | Int. J. Hydrogen Energ. 2022, 47, 39319 |
| PdC                                   | 96                                            | 82                                     | ACS Appl. Energy Mater. 2021, 4, 575    |
| PdSNC                                 | 30                                            | 56                                     | ACS Appl. Energy Mater. 2021, 4, 575    |
| Pd-TiO <sub>2</sub>                   | 108                                           | 64                                     | Mater. Today Nano, 2019, 6, 10038       |
| Pd/SW <sub>2</sub>                    | 130                                           | 82.4                                   | J. Catal. 2019, 380, 215                |
| Pd <sub>4</sub> S-SNC                 | 32                                            | 52                                     | Small 2021, 17, 2007511                 |
| Cu-Pd/HASG                            | 145                                           | 75                                     | Catal. Today. 2020,357, 279             |
| PdSe <sub>2</sub>                     | 150                                           | 70                                     | Appl. Surf. Sci. 2021, 570, 151178      |
| Pd <sub>83.5</sub> Ir <sub>16.5</sub> | 73                                            | 43.6                                   | Inorg. Chem. 2020, 59, 3321             |

**Table S3.** Comparison the TOF values of Pd@Uio-66-NH<sub>2</sub> with the reported catalysts in 0.5 M H<sub>2</sub>SO<sub>4</sub> solutions.

| Catalyst                       | TOF (s <sup>-1</sup> ) @ η (V) | Reference                               |
|--------------------------------|--------------------------------|-----------------------------------------|
| Pd@Uio-66-NH <sub>2</sub>      | 2.2@0.05                       | This work                               |
| Pt/C                           | 1.46@0.05                      | Adv. Sci. 2021, 8, 2001881              |
| Ru@C <sub>2</sub> N            | 1.66@0.05                      | Nat. Nanotechnol. 2017, 12, 441         |
| PdCuNi-S                       | 0.03188@0.1                    | Appl. Catal. B- Environ. 2019, 246, 156 |
| PdCu-S                         | 0.0088@0.1                     | Appl. Catal. B- Environ. 2019, 246, 156 |
| Pd-S                           | 0.0011@0.1                     | Appl. Catal. B- Environ. 2019, 246, 156 |
| Ni <sub>5</sub> P <sub>4</sub> | 2.9@0.2                        | ACS Catal. 2013, 3, 166                 |
| α-Mo <sub>2</sub> C            | 0.9@0.2                        | J. Mater. Chem. A 2015, 3, 8361         |
